# Supplementary material for: Prediction of Contact Residue Pairs Based on Co-Substitution between Sites in Protein Structures
Source: PLOS journal article supplement (doi:10.1371/journal.pone.0054252), 2013-01-16
Supplement: S1 (10.1371/journal.pone.0054252.s001) [file journal.pone.0054252.s001-s007.tar.bz2]

**Table S1. Dependence of contact prediction accuracies on phylogenetic trees.**

| Pfam ID*     | #contacts<br>/#sites** | ***<br>TP + FP | DI §§        | PPV§           |                                                  |              | Relative log-likelihood† |                 |              |
|--------------|------------------------|----------------|--------------|----------------|--------------------------------------------------|--------------|--------------------------|-----------------|--------------|
|              |                        |                |              | †<br>Pfam tree | §§§<br>$\rho_{ij}^{\dagger\dagger}$<br>FastTree2 | ††<br>ExaML  | †<br>Pfam tree           | ††<br>FastTree2 | †††<br>ExaML |
| Trans_reg_C  | 111/76                 | 27             | 0.556        | <b>0.667</b>   | <b>0.667</b>                                     |              | (−772541.8)              | 2768.9          |              |
|              | 1.5                    | 37             | 0.432        | <b>0.622</b>   | 0.595                                            |              |                          |                 |              |
| CH           | 172/101                | 43             | <b>0.488</b> | 0.465          | 0.419                                            | 0.395        | (−246974.5)              | 1818.6          | 2988.1       |
|              | 1.7                    | 57             | 0.439        | <b>0.491</b>   | 0.456                                            | 0.351        |                          |                 |              |
| 7tm_1        | 372/248                | 93             | 0.194        | 0.344          | <b>0.366</b>                                     |              | (−1971205.1)             | 44545.9         |              |
|              | 1.5                    | 124            | 0.169        | <b>0.306</b>   | <b>0.306</b>                                     |              |                          |                 |              |
| SH3_1        | 89/48                  | 22             | 0.636        | <b>0.682</b>   | <b>0.682</b>                                     | <b>0.682</b> | (−178181.5)              | 1214.8          | 2566.5       |
|              | 1.9                    | 29             | 0.552        | 0.655          | 0.586                                            | <b>0.690</b> |                          |                 |              |
| Cadherin     | 220/91                 | 55             | 0.818        | <b>0.836</b>   | 0.800                                            |              | (−917754.4)              | 2891.1          |              |
|              | 2.4                    | 73             | 0.753        | <b>0.767</b>   | 0.740                                            |              |                          |                 |              |
| Trypsin      | 636/212                | 159            | 0.591        | <b>0.673</b>   | 0.648                                            |              | (−1843495.9)             | 5728.3          |              |
|              | 3.0                    | 212            | 0.533        | <b>0.613</b>   | 0.604                                            |              |                          |                 |              |
| Kunitz_BPTI  | 111/53                 | 27             | 0.444        | <b>0.593</b>   | 0.556                                            | 0.556        | (−127989.5)              | 600.6           | 1731.1       |
|              | 2.1                    | 37             | <b>0.541</b> | 0.486          | 0.514                                            | 0.514        |                          |                 |              |
| KH_1         | 90/57                  | 22             | 0.500        | 0.773          | <b>0.818</b>                                     |              | (−253902.4)              | 2428.0          |              |
|              | 1.6                    | 30             | 0.533        | <b>0.700</b>   | <b>0.700</b>                                     |              |                          |                 |              |
| RRM_1        | 133/70                 | 33             | 0.758        | <b>0.818</b>   | 0.788                                            |              | (−780196.4)              | 3056.8          |              |
|              | 1.9                    | 44             | 0.705        | <b>0.795</b>   | 0.773                                            |              |                          |                 |              |
| FKBP_C       | 200/92                 | 50             | 0.760        | <b>0.840</b>   | 0.800                                            |              | (−455605.4)              | 3935.5          |              |
|              | 2.2                    | 66             | 0.697        | 0.727          | <b>0.773</b>                                     |              |                          |                 |              |
| Lectin_C     | 246/103                | 61             | <b>0.770</b> | 0.705          | 0.705                                            |              | (−555599.9)              | 3073.6          |              |
|              | 2.4                    | 82             | <b>0.671</b> | 0.646          | 0.610                                            |              |                          |                 |              |
| Thioredoxin  | 188/99                 | 47             | 0.532        | 0.638          | <b>0.660</b>                                     |              | (−926791.5)              | 4137.4          |              |
|              | 1.9                    | 62             | 0.565        | <b>0.645</b>   | <b>0.645</b>                                     |              |                          |                 |              |
| Response_reg | 202/110                | 50             | 0.660        | 0.680          | <b>0.700</b>                                     |              | (−1654255.6)             | 2934.4          |              |
|              | 1.8                    | 67             | 0.642        | 0.687          | <b>0.716</b>                                     |              |                          |                 |              |
| RNase_H      | 273/128                | 68             | <b>0.559</b> | 0.471          | 0.456                                            |              | (−364080.9)              | 4787.3          |              |
|              | 2.1                    | 91             | <b>0.549</b> | 0.407          | 0.407                                            |              |                          |                 |              |
| Ras          | 335/159                | 83             | 0.699        | 0.699          | <b>0.723</b>                                     |              | (−932720.7)              | 9667.8          |              |
|              | 2.1                    | 111            | 0.631        | <b>0.685</b>   | 0.667                                            |              |                          |                 |              |

\* The threshold  $T_{bt}$  to remove OTUs with short branches and the number  $n_{otu}$  of remaining OTUs that are used for each protein here are listed in Table 2.

\*\* The numbers of contacts and of sites, and their ratio are listed. Protein structures used to calculate contact residue pairs are listed in Table 1. Neighboring residue pairs within 5 residues ( $|i - j| \leq 5$ ) along a peptide chain are excluded in the evaluation of prediction accuracy.

\*\*\* TP and FP are the numbers of true and false positives, and their sum is equal to the number of predicted contacts; only predictions for  $TP + FP = \#contacts/4$  and  $\#contacts/3$  are listed.

§ PPV stands for a positive predictive value; i.e.,  $PPV = TP/(TP + FP)$ . Better values are typed in a bold font.

§§ DI means the prediction based on the direct information (DI) score published in [16]; a filtering based on a secondary structure prediction is not applied but only a conservation filter [16] is.

§§§ Predictions based on the coevolution score.

† Pfam reference phylogenetic trees are used.

†† Phylogenetic trees optimized by FastTree2 [61] with the default option (JTT and CAT) for datasets of  $T_{bt} = 0.01$  or full alignments are used as tree topologies for these protein alignments whose  $T_{bt}$  values are listed in Table 2.

††† Phylogenetic trees optimized by FastTree2 [61] and then ExaML [62] with the default option (JTT and CAT) for datasets of  $T_{bt} = 0.01$  or full alignments are used as tree topologies for these protein alignments whose  $T_{bt}$  values are listed in Table 2.

‡ The log-likelihood of a tree with branch lengths optimized in a codon model for each topology of the Pfam reference tree, an appropriate ML tree by FastTree2 [61], and a maximum-likelihood tree by ExaML [62] is listed in relative to the log-likelihood of the Pfam reference tree whose value is written in parenthesis.
